# Supplementary material for: A Clinically Relevant Variant of the Human Hydrogen Sulfide‐Synthesizing Enzyme Cystathionine β‐Synthase: Increased CO Reactivity as a Novel Molecular Mechanism of Pathogenicity?
Source: Hindawi journal article supplement (doi:10.1155/2017/8940321), 2017-01-01

## SUPPLEMENTAL MATERIAL

### **A clinically relevant variant of the human hydrogen sulfide-synthesizing enzyme cystathionine $\beta$ -synthase: increased CO reactivity as a novel molecular mechanism of pathogenicity?**

João B. Vicente<sup>1,\*</sup>, Henrique G. Colaço<sup>2</sup>, Francesca Malagrino<sup>3,4</sup>, Paulo E. Santo<sup>1,5</sup>, André Gutierrez<sup>1</sup>, Tiago M. Bandejas<sup>1,5</sup>, Paula Leandro<sup>6</sup>, José A. Brito<sup>1</sup>, and Alessandro Giuffrè<sup>3,\*</sup>

1 - Instituto de Tecnologia Química e Biológica António Xavier, Universidade Nova de Lisboa, Oeiras, Portugal

2 - Instituto Gulbenkian da Ciência, Oeiras, Portugal

3 - CNR Institute of Molecular Biology and Pathology, Rome, Italy

4 - Department of Biochemical Sciences, Sapienza University of Rome, Italy.

5 - Instituto de Biologia Experimental e Tecnológica, Oeiras, Portugal

6 - Research Institute for Medicines and Department of Biochemistry and Human Biology, Faculty of Pharmacy, University of Lisbon, Portugal

**Supplementary Figure 1. SDS-PAGE analysis of CBS preparations.** Analysis of CBS samples employed in this study, corresponding to full-length CBS WT and p.P49L purified in the absence ('untreated') or presence ('treated') of PLP (20  $\mu$ M). Truncated WT and p.P49L CBS lacking the C-terminal AdoMet-binding domain were analyzed for comparison with the full-length protein. Denatured protein samples were loaded onto a pre-cast NuPAGE<sup>TM</sup> 10% Bis-Tris gel (Invitrogen) and ran at 200 V. Protein bands were stained with InstantBlue<sup>TM</sup> (Expedeon) according to the manufacturer's instructions. Protein marker: NZYColour Protein Marker II (Nzytech).

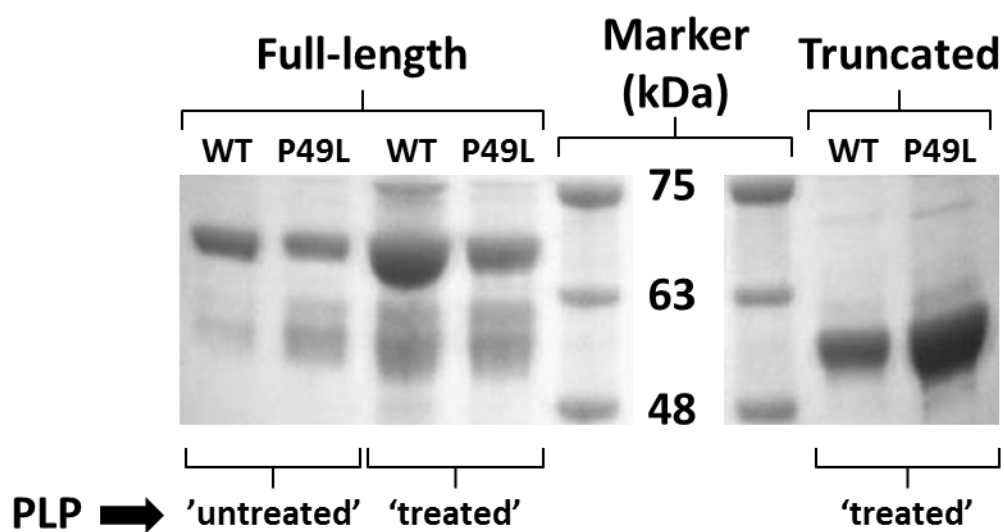

Supplement: f1 [file 8940321.f1.pdf]
